# Supplementary material for: Genome-Wide Analysis Reveals Four Novel Loci for Attention-Deficit Hyperactivity Disorder in Korean Youths
Source: PubMed Central journal article supplement — Soa Chongsonyon Chongsin Uihak. 2018 Apr 1;29(2):62–72. doi: 10.5765/jkacap.2018.29.2.62 (PMC7298899; doi:10.5765/jkacap.2018.29.2.62), 2018-04-01
Supplement: JKACAP-29-062_suppl.2.pdf [file JKACAP-29-062_suppl.2.pdf]

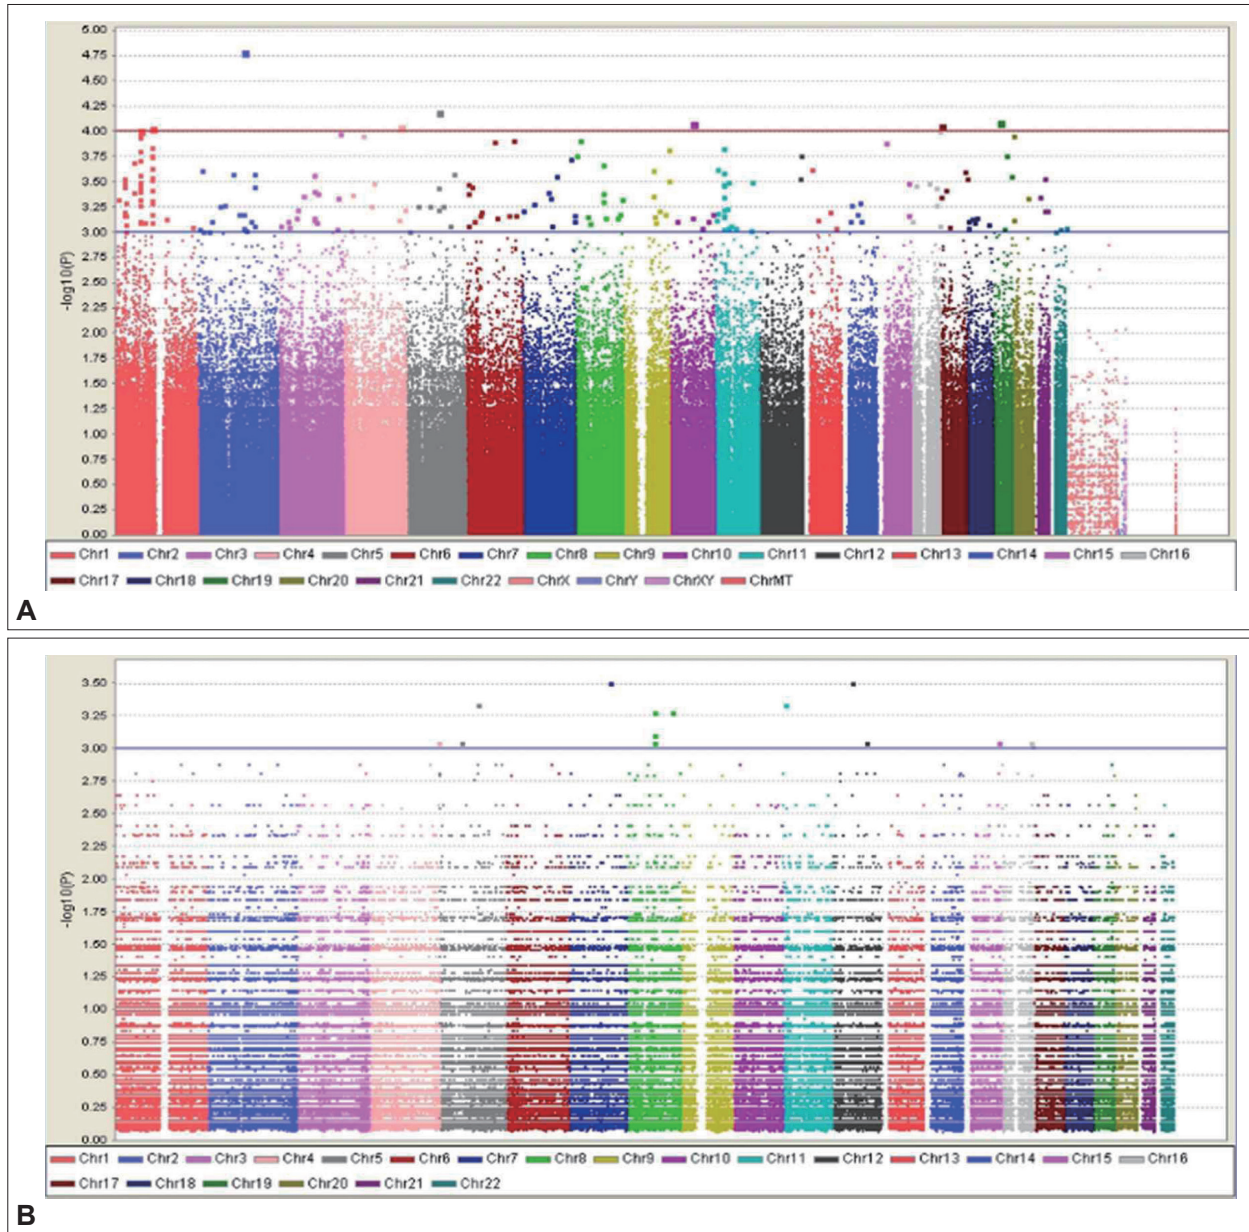

**Supplementary Fig. 1.** Manhattan plots. A: Manhattan plot of case-control GWAS. B: Manhattan plot of family-based GWAS. Chr: chromosome, GWAS: genome-wide association study.

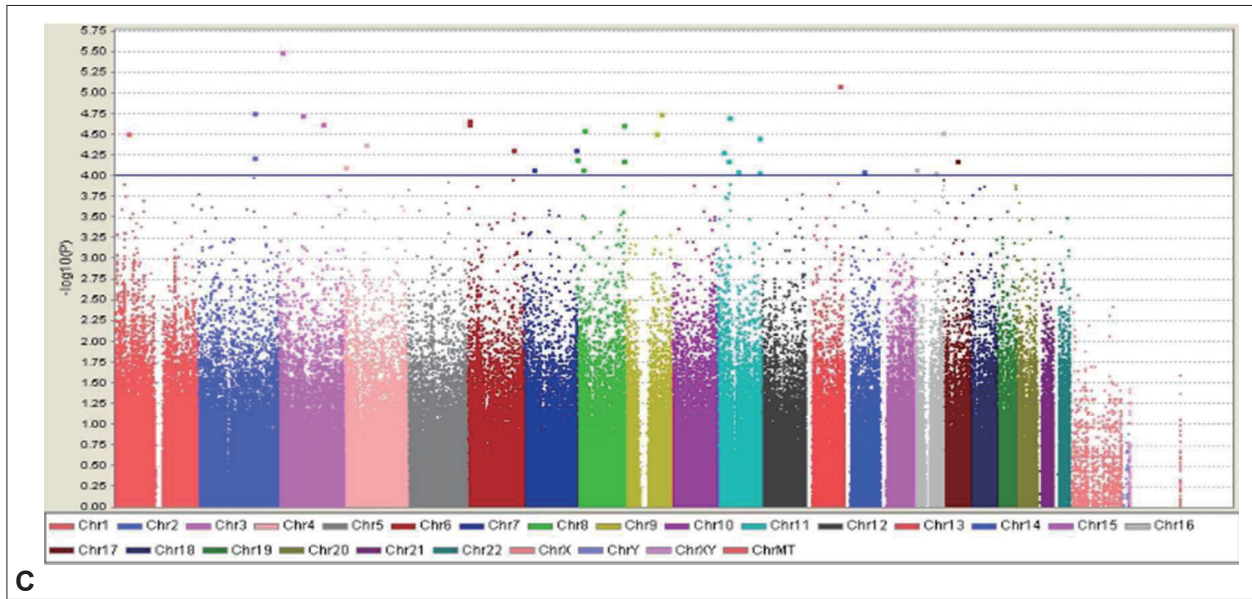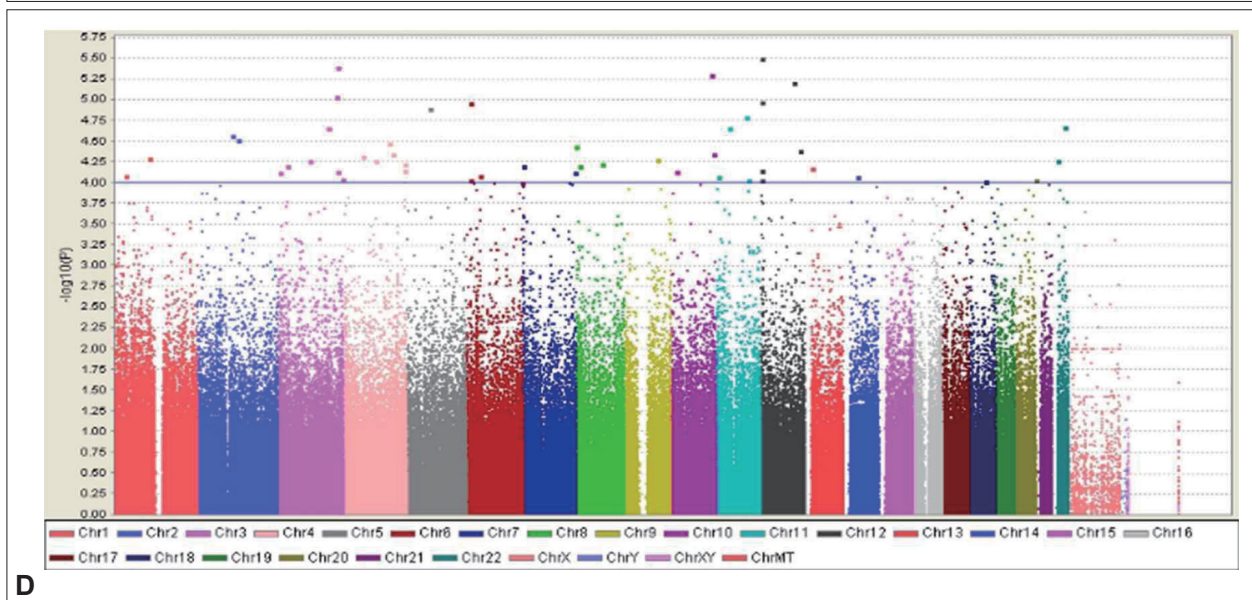

**Supplementary Fig. 1.** Manhattan plots. C: Manhattan plot of case-control genome-wide QTL analysis for inattention symptom count. D: Manhattan plot of case-control genome-wide QTL analysis for hyperactivity-impulsivity symptom count. Chr: chromosome, QTL: quantitative trait locus.



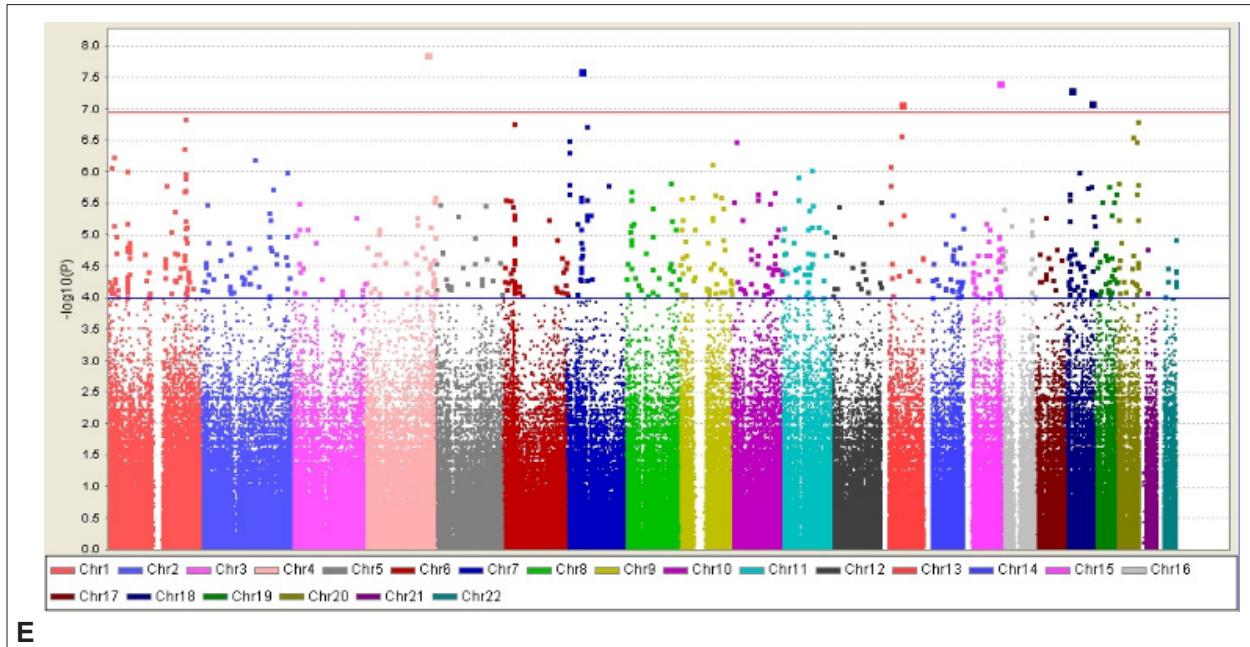

E

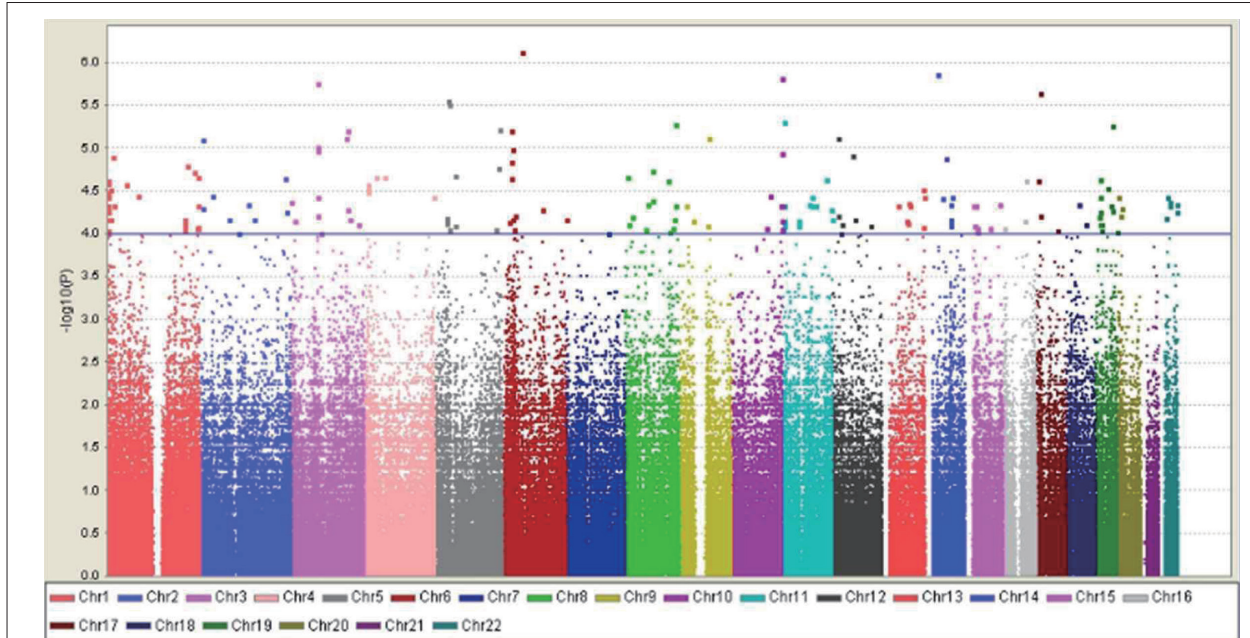

F

**Supplementary Fig. 1.** Manhattan plots. E: Manhattan plot of family-based genome-wide QTL analysis for inattention symptom count. F: Manhattan plot of family-based genome-wide QTL analysis for hyperactivity-impulsivity symptom count. Chr: chromosome, QTL: quantitative trait locus.
